# Supplementary material
Source: HighWire-hosted journal article supplement (https://thorax.bmj.com/content/74/11/1063)
Supplement: inline-supplementary-material-1 [file inline-supplementary-material-1.pdf]

eTable 1: Distribution of Exposure by ILA Category

| Exposure                              | ILA |                | Indeterminate ILA |                | No ILA |                | P value            | P value                   |
|---------------------------------------|-----|----------------|-------------------|----------------|--------|----------------|--------------------|---------------------------|
|                                       | N   | Mean (SD) or % | N                 | Mean (SD) or % | N      | Mean (SD) or % | (3-way comparison) | (Indeterminate vs No ILA) |
| Proximity to Road                     | 173 |                | 1,066             |                | 1,351  |                | 0.89               | 0.76                      |
| < 100 m                               |     | 29.5           |                   | 28.8           |        | 27.5           |                    |                           |
| 100 - <200 m                          |     | 16.2           |                   | 13.3           |        | 14.7           |                    |                           |
| 200 - < 400 m                         |     | 21.4           |                   | 21.4           |        | 21.8           |                    |                           |
| ≥400 m                                |     | 33.0           |                   | 36.5           |        | 36.1           |                    |                           |
| PM <sub>2.5</sub> , µg/m <sup>3</sup> | 161 | 9.8 (1.5)      | 954               | 9.6 (1.4)      | 1,204  | 9.7 (1.4)      | 0.44               | 0.49                      |
| EC, µg/m <sup>3</sup>                 | 161 | 0.46 (0.16)    | 955               | 0.44 (0.13)    | 1,205  | 0.44 (0.12)    | 0.17               | 0.98                      |
| O <sub>3</sub> , ppb                  | 172 | 38.1 (2.2)     | 1,062             | 38.0 (2.3)     | 1,350  | 38.1 (2.4)     | 0.71               | 0.45                      |

eTable 2: Distribution of Exposure by ILA Progression Category

| Exposure                              | ILA with Progression |                | ILA without Progression |                | Indeterminate ILA Progression |                | No ILA on Either CT |                | P value            | P value                                |
|---------------------------------------|----------------------|----------------|-------------------------|----------------|-------------------------------|----------------|---------------------|----------------|--------------------|----------------------------------------|
|                                       | N                    | Mean (SD) or % | N                       | Mean (SD) or % | N                             | Mean (SD) or % | N                   | Mean (SD) or % | (4-way comparison) | (Indeterminate vs No ILA on Either CT) |
| Proximity to Road                     | 116                  |                | 36                      |                | 1,035                         |                | 642                 |                | 0.61               | 0.67                                   |
| < 100 m                               |                      | 31.9           |                         | 25.0           |                               | 28.2           |                     | 26.0           |                    |                                        |
| 100 - <200 m                          |                      | 18.1           |                         | 13.9           |                               | 13.2           |                     | 15.0           |                    |                                        |
| 200 - < 400 m                         |                      | 18.1           |                         | 13.9           |                               | 21.6           |                     | 22.0           |                    |                                        |
| ≥400 m                                |                      | 31.9           |                         | 47.2           |                               | 37.0           |                     | 37.1           |                    |                                        |
| PM <sub>2.5</sub> , µg/m <sup>3</sup> | 105                  | 9.8 (1.3)      | 31                      | 10.1 (0.7)     | 899                           | 9.6 (1.4)      | 578                 | 9.7 (1.3)      | 0.15               | 0.39                                   |
| EC, µg/m <sup>3</sup>                 | 105                  | 0.46 (0.16)    | 31                      | 0.45 (0.08)    | 900                           | 0.44 (0.13)    | 578                 | 0.44 (0.13)    | 0.57               | 0.82                                   |
| O <sub>3</sub> , ppb                  | 116                  | 38.2 (2.1)     | 36                      | 38.0 (2.2)     | 1,031                         | 38.0 (2.4)     | 642                 | 38.0 (2.4)     | 0.73               | 0.65                                   |

**eTable 3: Associations of Exposure to Traffic and Pollutants with Odds ILA and ILA Progression INCLUDING Indeterminate CT Findings**

|                                            | Odds of ILA vs No ILA |                   | <i>Odds of Indeterminate ILA vs No ILA</i> | Odds of ILA with Progression vs No ILA on Either CT |                   | Odds of ILA without Progression vs No ILA on Either CT | <i>Odds of Indeterminate ILA Progression vs No ILA on Either CT</i> |
|--------------------------------------------|-----------------------|-------------------|--------------------------------------------|-----------------------------------------------------|-------------------|--------------------------------------------------------|---------------------------------------------------------------------|
|                                            | Model N               | OR (95% CI)       | OR (95% CI)                                | Model N                                             | OR (95% CI)       | OR (95% CI)                                            | OR (95% CI)                                                         |
| <b>Proximity to Road</b> (vs $\geq 400$ m) | 2,540                 |                   |                                            | 1,803                                               |                   |                                                        |                                                                     |
| < 100 m                                    |                       | 1.05 (0.68, 1.63) | 1.02 (0.83, 1.26)                          |                                                     | 1.18 (0.68, 2.04) | -                                                      | 1.06 (0.81, 1.37)                                                   |
| 100 - <200 m                               |                       | 1.20 (0.71, 2.04) | 0.92 (0.70, 1.19)                          |                                                     | 1.62 (0.84, 3.10) | -                                                      | 0.93 (0.68, 1.28)                                                   |
| 200 - < 400 m                              |                       | 1.11 (0.69, 1.78) | 0.98 (0.78, 1.23)                          |                                                     | 0.86 (0.46, 1.60) | -                                                      | 0.95 (0.72, 1.26)                                                   |
| <b>PM<sub>2.5</sub></b>                    | 2,277                 | 1.02 (0.85, 1.22) | 0.96 (0.89, 1.04)                          | 1,591                                               | 1.07 (0.83, 1.37) | 1.31 (0.88, 1.97)                                      | 0.96 (0.87, 1.06)                                                   |
| <b>EC</b>                                  | 2,279                 | 1.20 (0.99, 1.44) | 1.00 (0.90, 1.10)                          | 1,592                                               | 1.15 (0.90, 1.46) | 1.16 (0.77, 1.74)                                      | 0.99 (0.88, 1.12)                                                   |
| <b>O<sub>3</sub></b>                       | 2,534                 | 0.93 (0.80, 1.09) | 0.96 (0.90, 1.02)                          | 1,799                                               | 1.02 (0.84, 1.24) | 0.97 (0.72, 1.31)                                      | 1.00 (0.93, 1.08)                                                   |

\* All models were adjusted for age, sex, BMI, smoking status, packyears of smoking, any household smoking during adulthood, median value of owner occupied housing in the census block group in 2000, education, primary occupation, cohort, and date. OR's for ILA without Progression by proximity to road category are not shown due to small sample size and wide confidence intervals. OR's for associations with pollutants scaled per 1.3  $\mu\text{g}/\text{m}^3$  in 2004-2008 PM<sub>2.5</sub>, 0.14  $\mu\text{g}/\text{m}^3$  in 2004-2008 EC, and 1.8 ppb in 2004-2008 O<sub>3</sub>.

**eTable 4: Associations of Exposure to Traffic and Pollutants with Odds ILA and ILA Progression EXCLUDING Movers**

|                                | Odds of ILA vs No ILA |                   | Odds of ILA with Progression vs No ILA on Either CT |                   | Odds of ILA without Progression vs No ILA on Either CT |
|--------------------------------|-----------------------|-------------------|-----------------------------------------------------|-------------------|--------------------------------------------------------|
|                                | Model N               | OR (95% CI)       | Model N                                             | OR (95% CI)       | OR (95% CI)                                            |
| Proximity to Road (vs ≥ 400 m) | 1,110                 |                   | 603                                                 |                   |                                                        |
| < 100 m                        |                       | 0.77 (0.44, 1.35) |                                                     | 1.09 (0.53, 2.25) | -                                                      |
| 100 - <200 m                   |                       | 1.05 (0.53, 2.10) |                                                     | 2.06 (0.85, 5.00) | -                                                      |
| 200 - < 400 m                  |                       | 1.41 (0.80, 2.47) |                                                     | 1.12 (0.50, 2.47) | -                                                      |
| PM <sub>2.5</sub>              | 1,030                 | 0.97 (0.78, 1.21) | 561                                                 | 1.15 (0.85, 1.57) | 1.48 (0.88, 2.49)                                      |
| EC                             | 1,031                 | 1.18 (0.93, 1.51) | 561                                                 | 1.40 (1.02, 1.94) | 1.38 (0.82, 2.30)                                      |
| O <sub>3</sub>                 | 1,109                 | 0.90 (0.75, 1.09) | 603                                                 | 0.91 (0.70, 1.18) | 0.95 (0.63, 1.44)                                      |

\* All models were adjusted for age, sex, BMI, smoking status, packyears of smoking, any household smoking during adulthood, median value of owner occupied housing in the census block group in 2000, education, primary occupation, cohort, and date. OR’s for ILA without Progression by proximity to road category are not shown due to small sample size and wide confidence intervals. OR’s for associations with pollutants scaled per 1.3 µg/m<sup>3</sup> in 2004–2008 PM<sub>2.5</sub>, 0.14 µg/m<sup>3</sup> in 2004–2008 EC, and 1.8 ppb in 2004–2008 O<sub>3</sub>.

**eTable 5: Associations of Exposure to Traffic and Pollutants with Odds ILA and ILA Progression EXCLUDING Current Smokers**

| Exposures                      | Odds of ILA vs No ILA |                   | Odds of ILA with Progression vs No ILA on Either CT |                   | Odds of ILA without Progression vs No ILA on Either CT |
|--------------------------------|-----------------------|-------------------|-----------------------------------------------------|-------------------|--------------------------------------------------------|
|                                | Model N               | OR (95% CI)       | Model N                                             | OR (95% CI)       | OR (95% CI)                                            |
| Proximity to Road (vs ≥ 400 m) | 1,397                 |                   | 734                                                 |                   |                                                        |
| < 100 m                        |                       | 1.08 (0.65, 1.77) |                                                     | 1.20 (0.62, 2.32) | -                                                      |
| 100 - <200 m                   |                       | 1.30 (0.71, 2.37) |                                                     | 2.22 (1.01, 4.88) | -                                                      |
| 200 - < 400 m                  |                       | 1.17 (0.69, 2.01) |                                                     | 0.92 (0.44, 1.91) | -                                                      |
| PM <sub>2.5</sub>              | 1,248                 | 0.93 (0.75, 1.15) | 659                                                 | 1.18 (0.88, 1.58) | 1.75 (0.94, 3.26)                                      |
| EC                             | 1,249                 | 1.19 (0.94, 1.49) | 659                                                 | 1.38 (1.02, 1.87) | 1.34 (0.79, 2.29)                                      |
| O <sub>3</sub>                 | 1,395                 | 0.93 (0.78, 1.11) | 734                                                 | 0.95 (0.75, 1.21) | 0.86 (0.60, 1.23)                                      |

\* All models were adjusted for age, sex, BMI, smoking status, packyears of smoking, any household smoking during adulthood, median value of owner occupied housing in the census block group in 2000, education, primary occupation, cohort, and date. OR’s for ILA without Progression by proximity to road category are not shown due to small sample size and wide confidence intervals. OR’s for associations with pollutants scaled per 1.3 µg/m<sup>3</sup> in 2004-2008 PM<sub>2.5</sub>, 0.14 µg/m<sup>3</sup> in 2004-2008 EC, and 1.8 ppb in 2004-2008 O<sub>3</sub>.
